# Supplementary material for: Evaluation of Printability of PVA-Based Tablets from Powder and Assessment of Critical Rheological Parameters
Source: MDPI journal article supplement (doi:10.3390/pharmaceutics16040553), 2024-04-19
Supplement: s1 [file s1]

## Supplementary

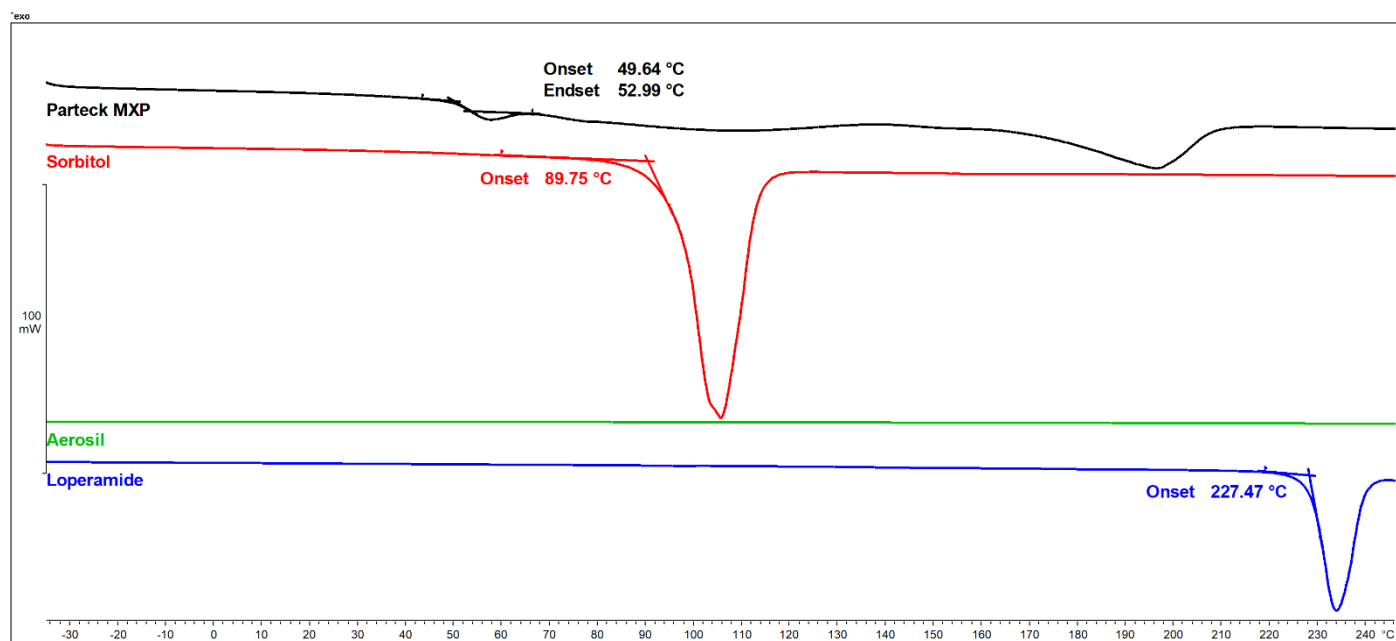

**Figure S1.** First heating: neat substances

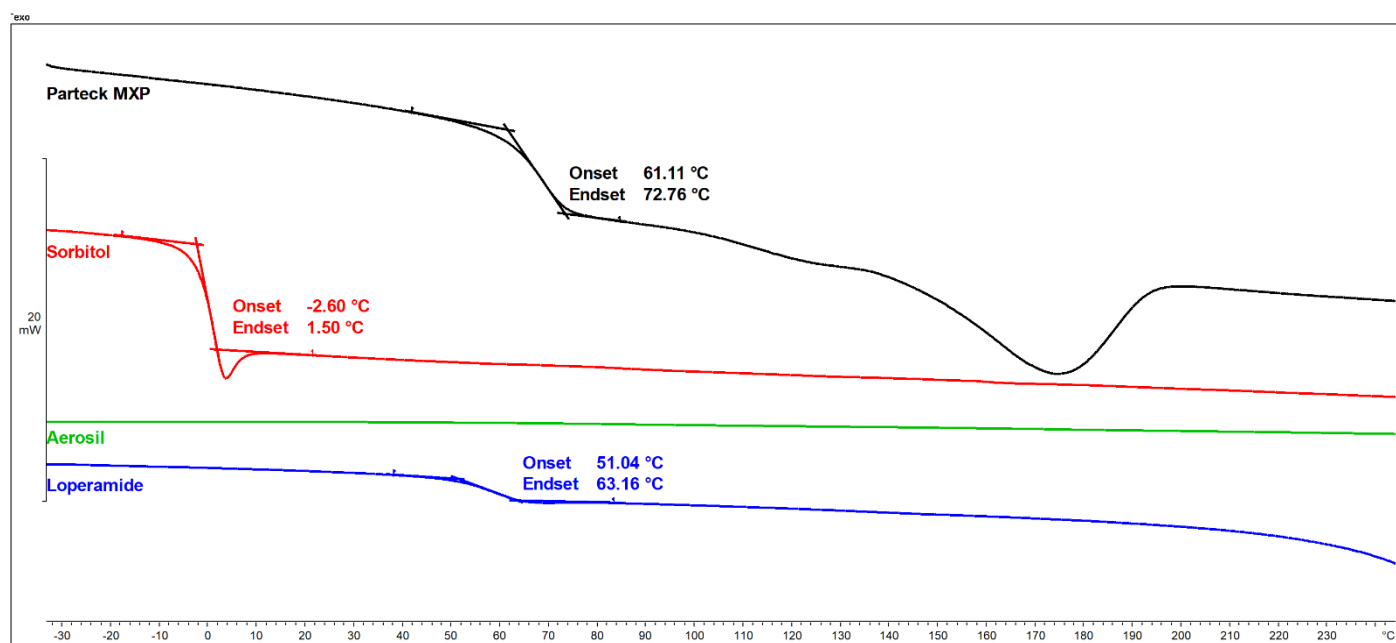

**Figure S2.** Second heating: neat substances

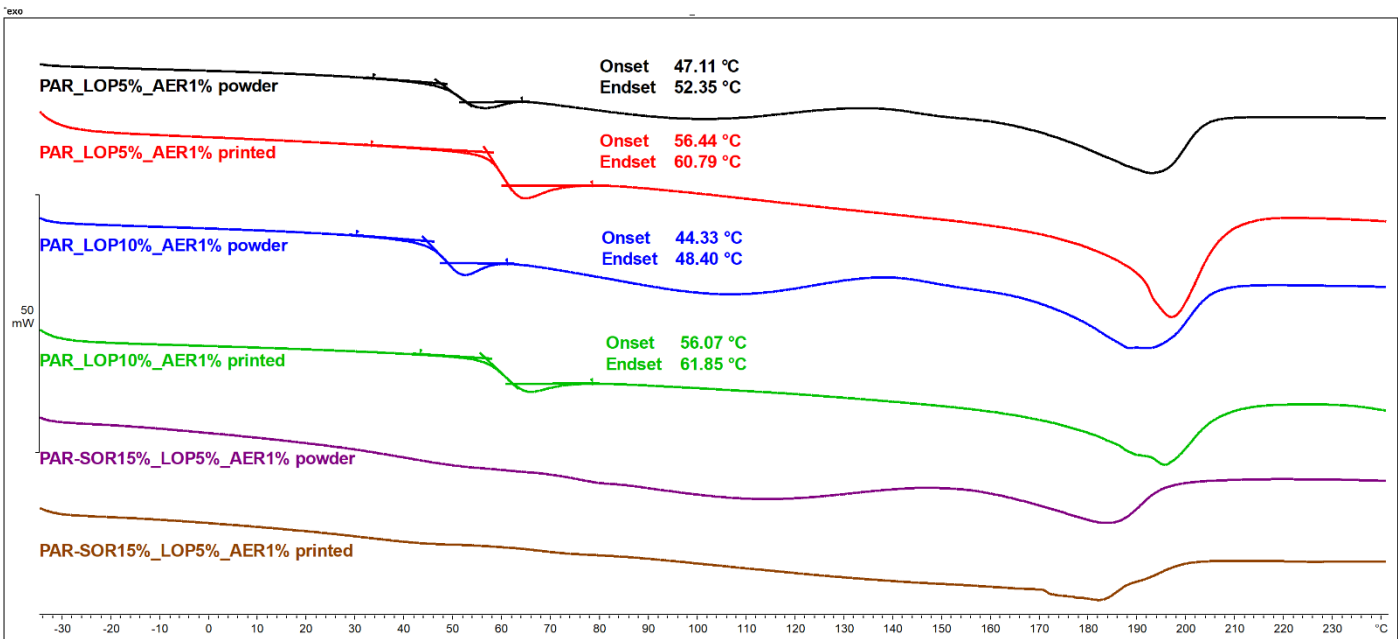

Figure S3. First heating: powdered and printed samples

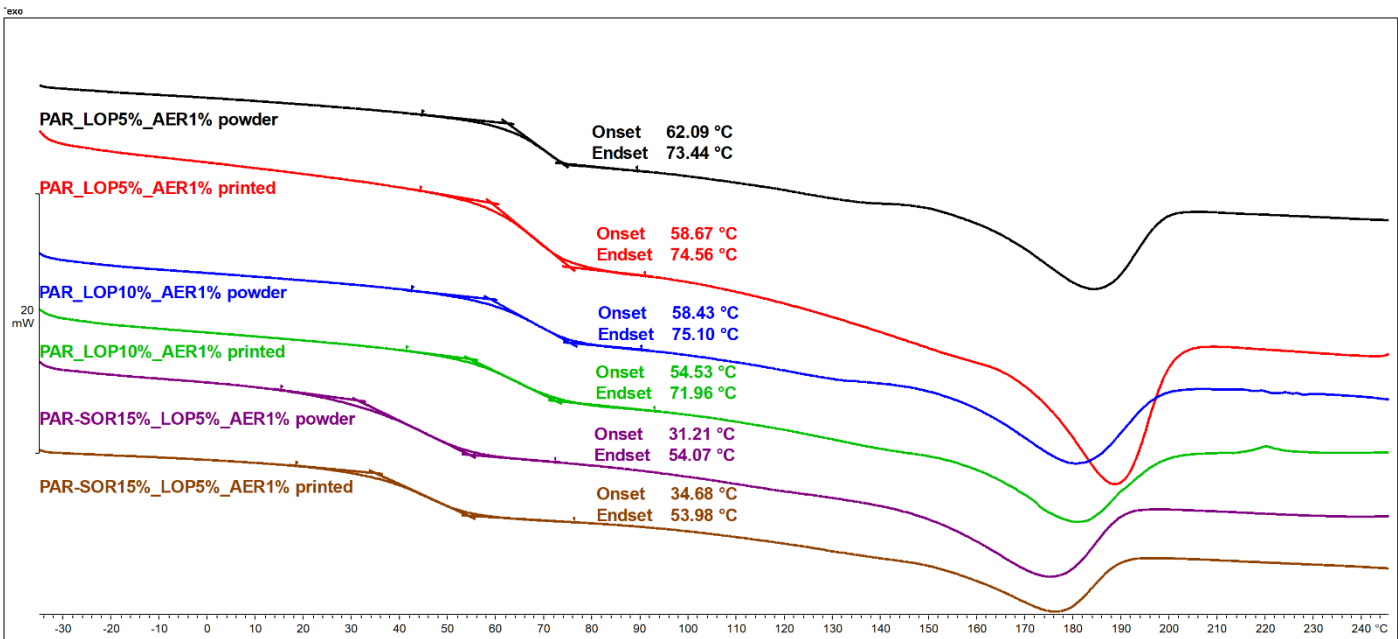

Figure S4. Second heating: powdered and printed samples

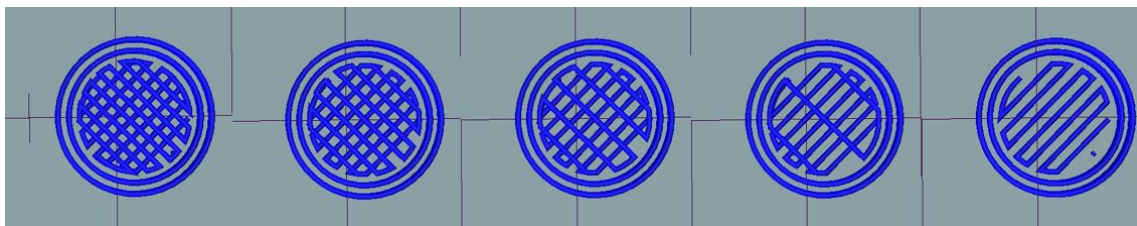

**Figure S5.** Sliced tablets for visualization of infill

The picture of the sliced tablets shows the layers 2-4 for each individual infill (100% - 0% filtr.) As shown above, the solid layer is constant for each infill and no additional infill is placed for 0% tablets. The addition of 3 top solid layers closes the hollow tablet sufficiently.

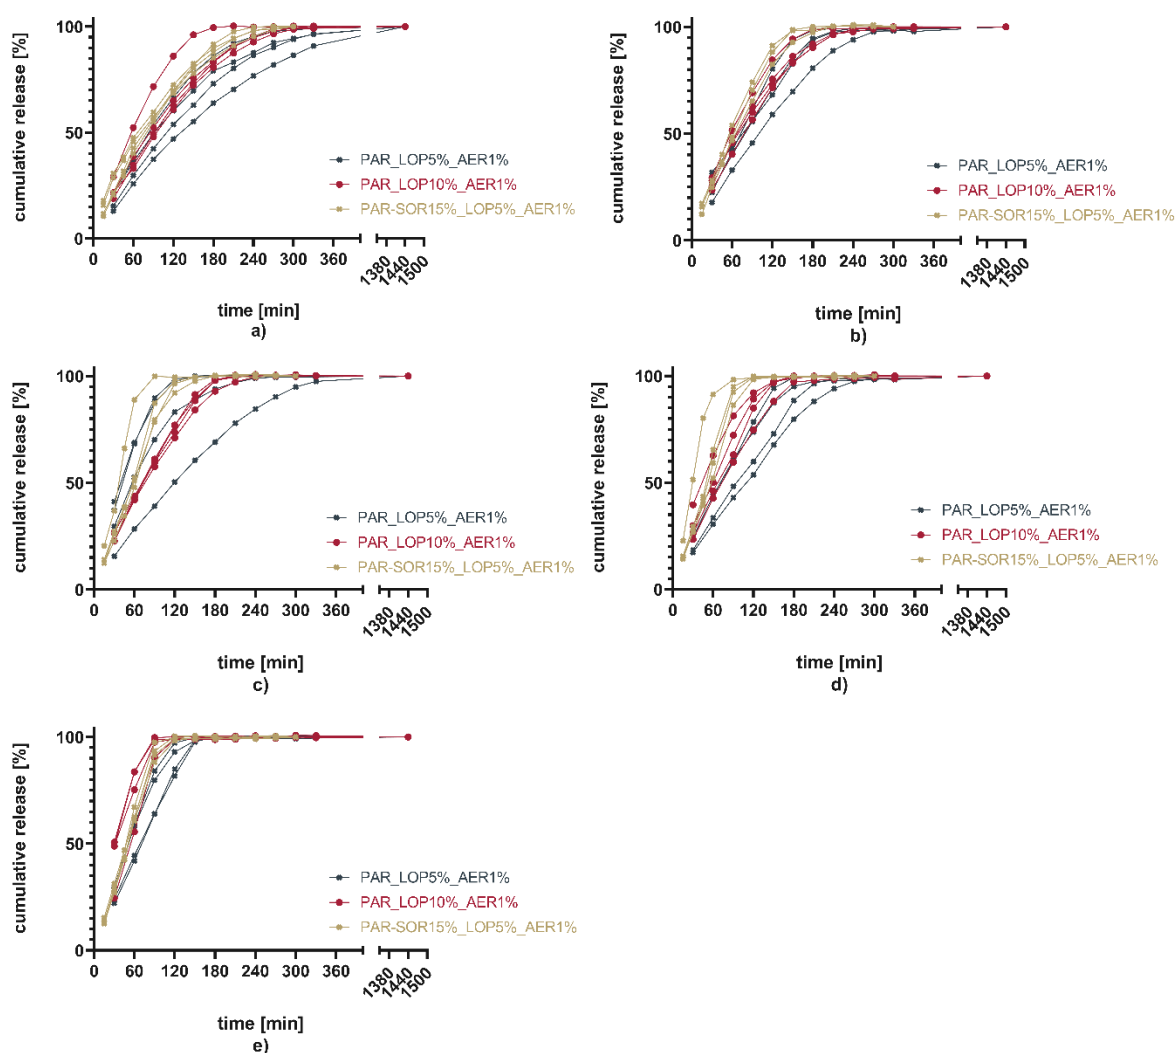

**Figure S6.** Dissolution data of individual tablets (100%: a), 75%: b), 50%: c), 25%: d), 0%: e))
